# Supplementary material for: Porous organic cages as inhibitors of Aβ42 peptide aggregation: a simulation study
Source: Royal Society of Chemistry journal article supplement (doi:10.1039/d4cp03549f), 2024-01-01
Supplement: d4cp03549f1.pdf [file d4cp03549f1.pdf]

## Supplementary Material

for

### **Porous organic cage as an inhibitor of A $\beta$ <sub>42</sub> peptide: a simulation study**

*Daohui Zhao<sup>1#</sup>, Yu Zhou<sup>1#</sup>, Fen Xing<sup>2</sup>, Hangxing Wang<sup>1\*</sup>, Jian Zhou<sup>3\*</sup>,*

*<sup>1</sup> Hubei Collaborative Innovation Center for Advanced Organic Chemical Materials, Ministry of Education Key Laboratory for the Synthesis and Application of Organic Functional Molecules, School of Chemistry and Chemical Engineering, Hubei University, Wuhan 430062, P.R. China*

*<sup>2</sup> Department of Radiology, Renmin Hospital of Wuhan University, Wuhan 430060, P. R. China*

*<sup>3</sup> School of Chemistry and Chemical Engineering, South China University of Technology, Guangzhou 510640, P. R. China*

---

# These authors contributed equally to this work.

\* Corresponding author.

*Email-addresses:* wanghx@hubu.edu.cn (H. Wang), jianzhou@scut.edu.cn (J. Zhou).

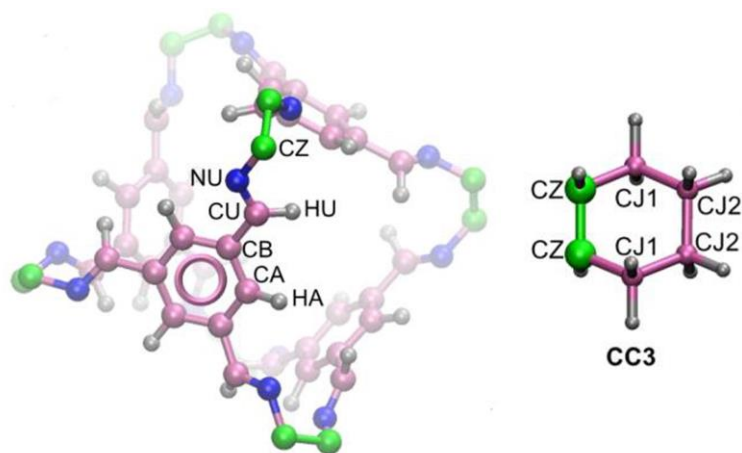

**Figure S1.** Atom types in CC3<sup>1,2</sup>.

**Table S1.** Non-bonded parameters in CC3<sup>1,2</sup>.

| Atom type | $\sigma$ (nm) | $\epsilon$ (kJ/mol) | Charge(e) |
|-----------|---------------|---------------------|-----------|
| CA        | 0.355         | 0.2929              | 0.00      |
| HA        | 0.242         | 0.1255              | 0.06      |
| CB        | 0.355         | 0.2929              | -0.16     |
| CU        | 0.350         | 0.3347              | 0.47      |
| HU        | 0.250         | 0.2092              | 0.00      |
| NU        | 0.325         | 0.7113              | -0.62     |
| CZ        | 0.350         | 0.2761              | 0.22      |
| HZ        | 0.250         | 0.1255              | 0.03      |
| CJ1       | 0.350         | 0.2761              | -0.13     |
| HJ1       | 0.250         | 0.1255              | 0.05      |
| CJ2       | 0.350         | 0.2761              | 0.07      |
| HJ2       | 0.250         | 0.1255              | -0.02     |

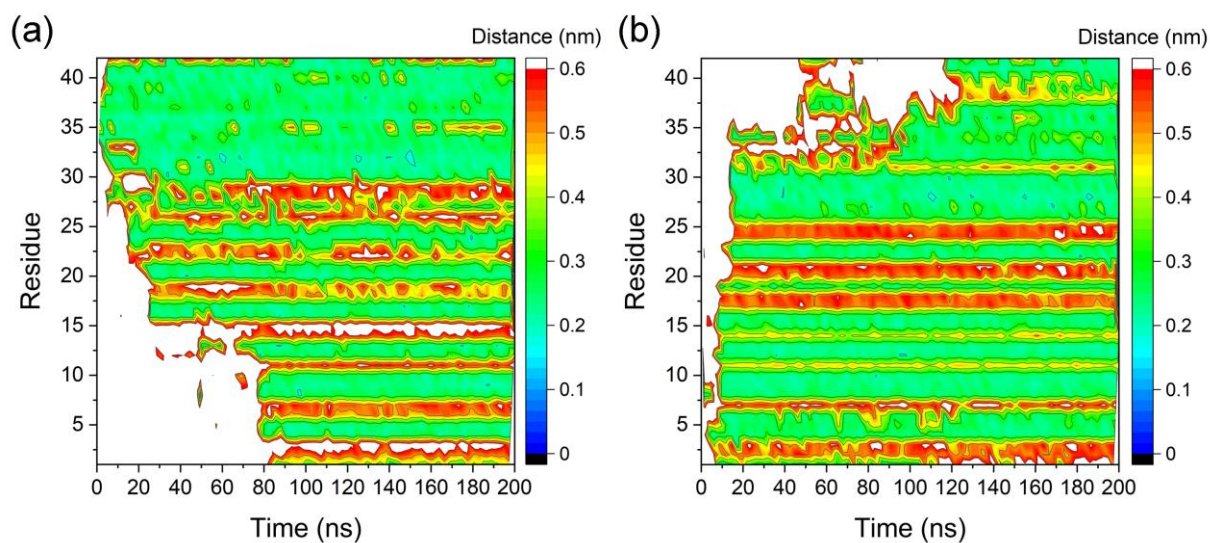

**Figure S2.** The residue contact maps of Aβ<sub>42</sub> peptide adsorbed on CC3 surfaces (a) plane and (b) sphere.

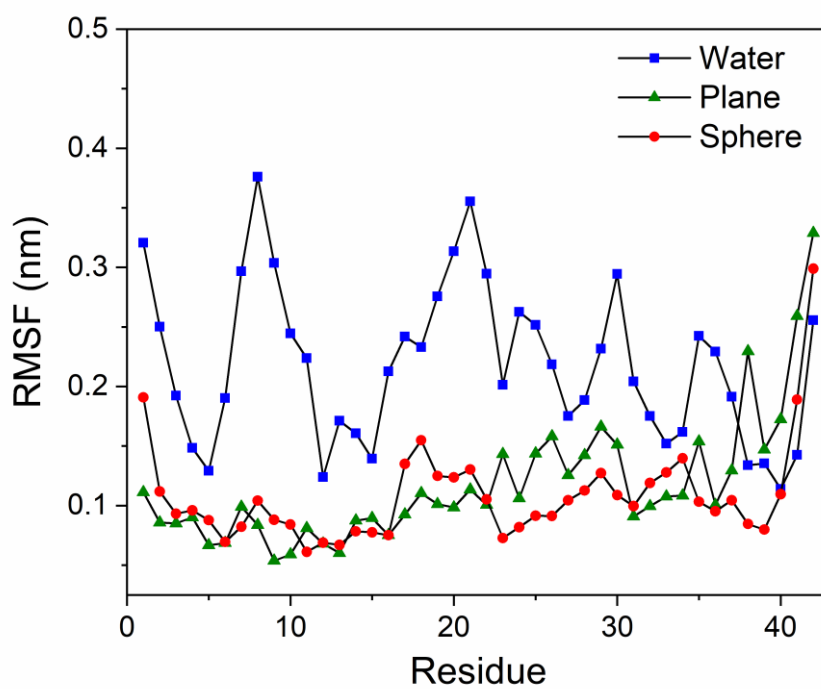

**Figure S3.** RMSF of C<sub>α</sub> atoms of Aβ<sub>42</sub> peptide averaged over the last 40 ns trajectory.

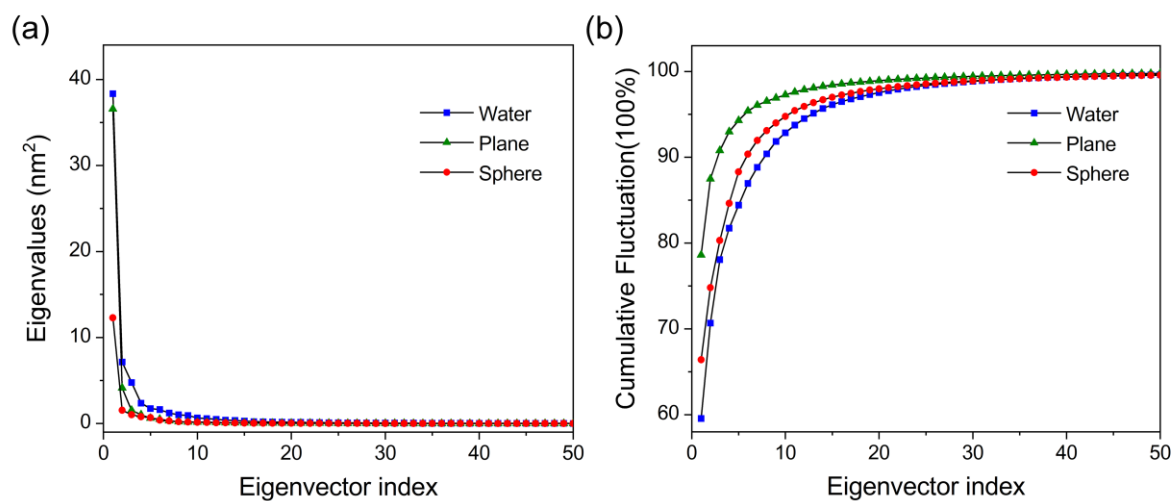

**Figure S4.** The (a) eigenvalues (nm<sup>2</sup>) and (b) cumulative percentages (%) of the first 50 eigenvectors derived from PCA analysis of the Aβ<sub>42</sub> peptide backbone atoms in water and on the CC3 crystals versus eigenvector indices.

## References

1. M. J. Bojdys, T. Hasell, N. Severin, K. E. Jelfs, J. P. Rabe and A. I. Cooper, *Chem. Commun.*, 2012, **48**, 11948-11950.
2. X. Kong and J. Jiang, *Phys. Chem. Chem. Phys.*, 2017, **19**, 18178-18185.
